# Supplementary material for: Protection of nascent DNA at stalled replication forks is mediated by phosphorylation of RIF1 intrinsically disordered region
Source: eLife journal article supplement (doi:10.7554/elife.75047), 2022-03-31
Supplement: fig2-data3 [file 75047Figure2SourceData3.pdf › 75047Figure2SourceData3.pdf]

F

RIF1<sup>WT</sup> VNEDSQAAAL----SCSDSQERES---TRRASQGLIS  
RIF1<sup>S→A</sup> VNEDAQAAAL----SCSDAQERES---TRRAAQGLIS

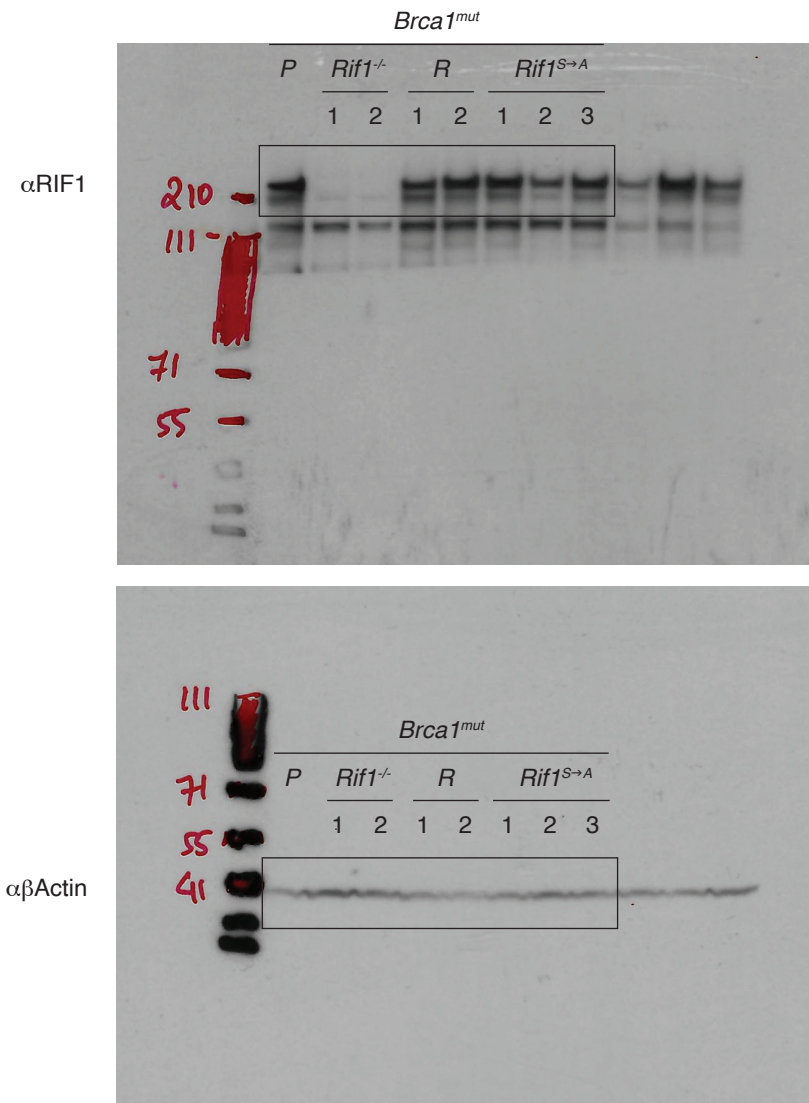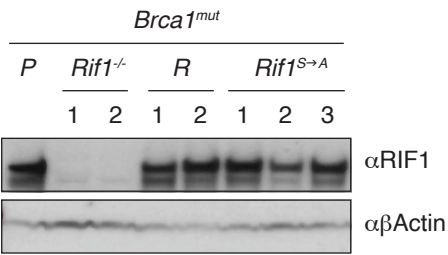

Figure 2
