# Supplementary material for: Protection of nascent DNA at stalled replication forks is mediated by phosphorylation of RIF1 intrinsically disordered region
Source: eLife journal article supplement (doi:10.7554/elife.75047), 2022-03-31
Supplement: fig4-data9 [file elife-75047-fig4-data9-v1.zip]

# Sandhya PPR Lentivir 2P+MS.

Arg/Kij1 2P

19/1/2022  
25 sec  
Normal cell

HV  
ATM1  
ATM2

Fig →

- + - + +  
- - - - +

R2 WT R1 WT R2 R4  
4-12% MOPS

Inputs.

4-12% MES

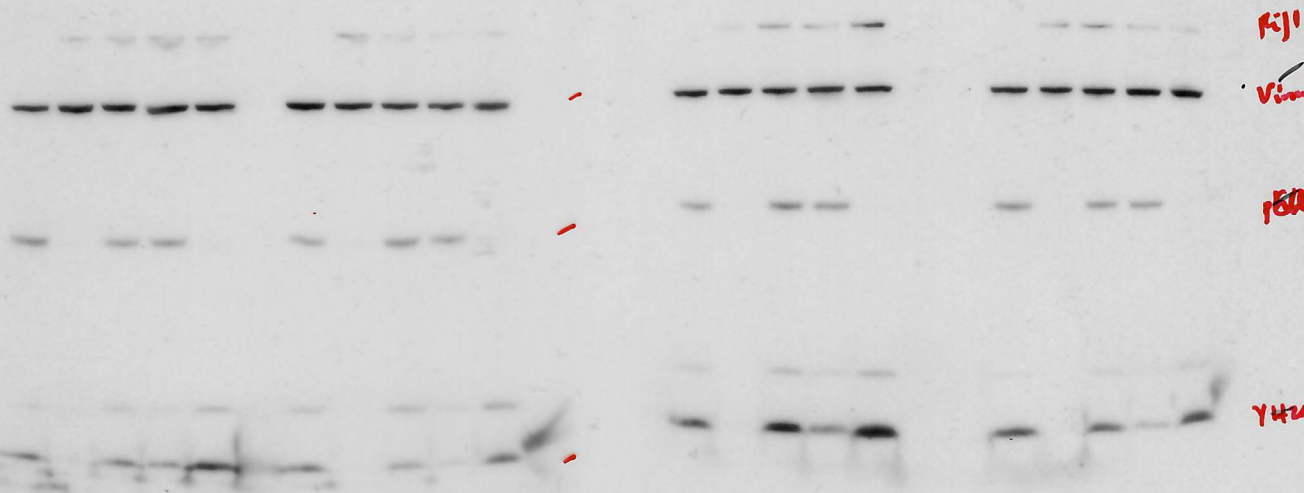

WT 1 R2 WT 2 R2 WT 3 R3 WT 4 R4  
+ - + + +  
- - - - +

HV  
ATM1  
ATM2
