# Supplementary material for: Protection of nascent DNA at stalled replication forks is mediated by phosphorylation of RIF1 intrinsically disordered region
Source: eLife journal article supplement (doi:10.7554/elife.75047), 2022-03-31
Supplement: fig4-data10 [file 75047Figure4SourceData10.pdf › 75047Figure4SourceData10.pdf]

| WT | Rif1 <sup>FH/FH</sup> |   |   |   |      |
|----|-----------------------|---|---|---|------|
| +  | -                     | + | + | + | HU   |
| -  | -                     | - | + | - | ATMi |
| -  | -                     | - | - | + | ATRi |

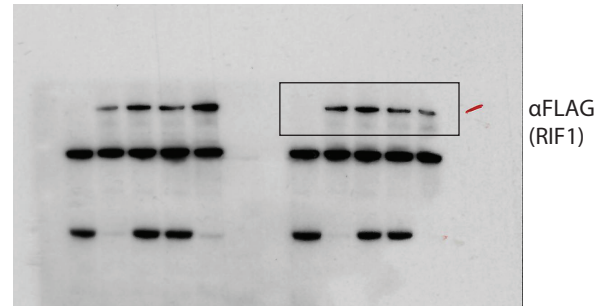

| WT | Rif1 <sup>FH/FH</sup> |   |   |   |      |
|----|-----------------------|---|---|---|------|
| +  | -                     | + | + | + | HU   |
| -  | -                     | - | + | - | ATMi |
| -  | -                     | - | - | + | ATRi |

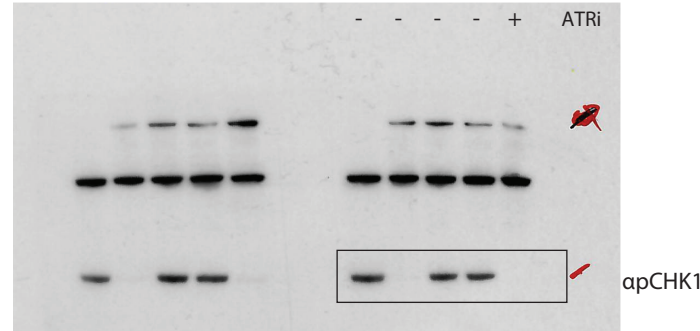

| WT | Rif1 <sup>FH/FH</sup> |   |   |   |      |
|----|-----------------------|---|---|---|------|
| +  | -                     | + | + | + | HU   |
| -  | -                     | - | + | - | ATMi |
| -  | -                     | - | - | + | ATRi |

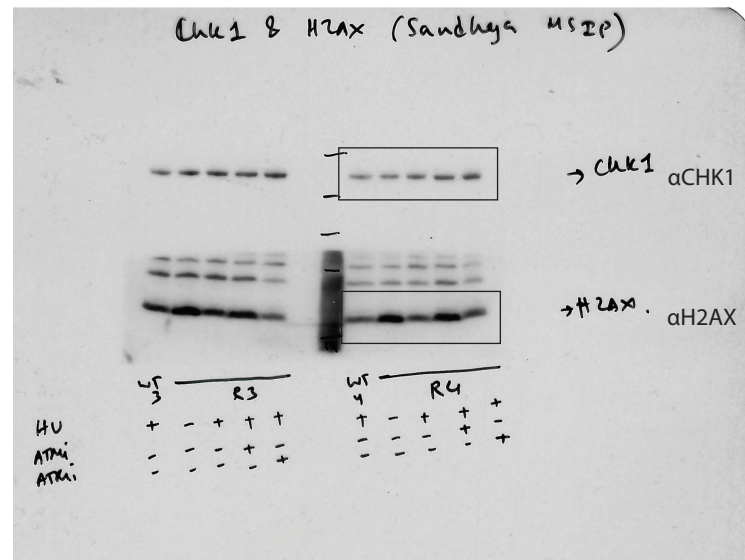

C

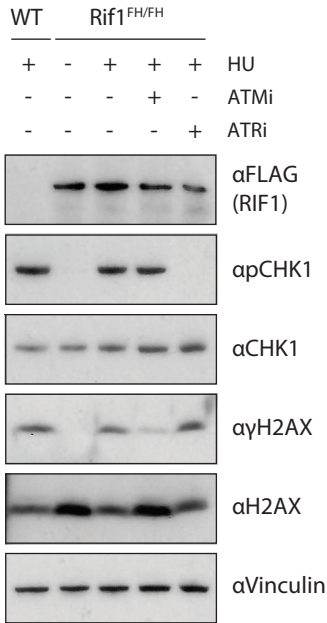

| WT | Rif1 <sup>FH/FH</sup> |   |   |   |      |
|----|-----------------------|---|---|---|------|
| +  | -                     | + | + | + | HU   |
| -  | -                     | - | + | - | ATMi |
| -  | -                     | - | - | + | ATRi |

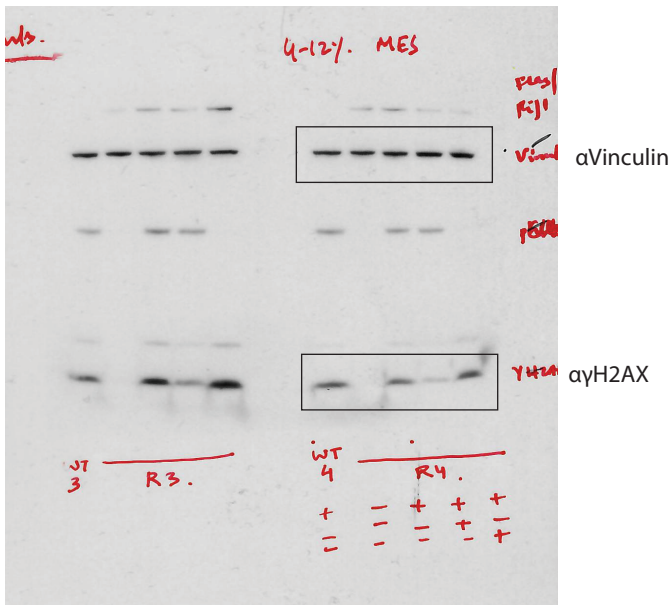

Figure 4
