# Supplementary material for: Protection of nascent DNA at stalled replication forks is mediated by phosphorylation of RIF1 intrinsically disordered region
Source: eLife. 2022 Apr 13;11:e75047. doi: 10.7554/eLife.75047 (PMC9007588; doi:10.7554/eLife.75047)
Supplement: Figure 1—source data 5. — Protein H/(H+L) ratios were derived using peptides’ H/L intensity values in MaxQuant output. [file elife-75047-fig1-data5.xlsx]

## Sheet: Figure 1D
																H/(H+L)
id	Protein Names	Gene Names		Protein Descriptions	Uniprot	Mol. Weight [kDa]	PEP	Ratio H/L	Intensity	Intensity L	Intensity H	Only identified by site	Reverse	Contaminant	MaxQuant prot id	ave	median	std	count
2263	Rap1-interacting factor 1 homolog;Telomere-associated protein RIF1;Rap1 interacting factor 1 homolog (Yeast)	Rif1;RP23-395O2.2-001	Rif1	Isoform 1 of Telomere-associated protein RIF1;Isoform 3 of Telomere-associated protein RIF1	Q6PR54-1;Q6PR54;Q6PR54-3;A2AQB0	266.23	0	19.77	389890000000	22727000000	367160000000				2263	0.943682	0.957102	0.0571132	168
1923	Rap1-interacting factor 1 homolog;Telomere-associated protein RIF1;Putative uncharacterized protein	Rif1;D2Ertd145e	Rif1	Isoform 2 of Telomere-associated protein RIF1	Q6PR54-2;Q6PR54;Q8CEM8	263.48	0	NaN	12761000	0	12761000				1923	0.944484	0.957198	0.0569521	168
1345	Transformation related protein 53 binding protein 1;Putative uncharacterized protein;Tumor suppressor p53-binding protein 1	RP23-437L13.2-001;Trp53bp1;RP23-437L13.2-002;Tp53bp1	Trp53bp1	transformation related protein 53 binding protein 1;Transformation related protein 53 binding protein 1;Isoform 1 of Tumor suppressor p53-binding protein 1;Isoform 3 of Tumor suppressor p53-binding protein 1;Isoform 2 of Tumor suppressor p53-binding protei	A2AU91;Q3V1P7;Q8BZ87;A2AU89;P70399-1;P70399;P70399-3;P70399-2	212.73	0	10.016	9150900000	1730000000	7421000000				1345	0.908136	0.916911	0.0539443	72
774	Serine/threonine-protein phosphatase PP1-alpha catalytic subunit;Putative uncharacterized protein;Serine/threonine-protein phosphatase	Ppp1a;Ppp1ca	Ppp1ca	Serine/threonine-protein phosphatase PP1-alpha catalytic subunit;Serine/threonine protein phosphatase (Fragment)	P62137;Q3U8W0;Q3TYF5	37.54	0	1.5547	38132000000	10040000000	28092000000				774	0.636734	0.605341	0.0984809	32
1518	Serine/threonine-protein phosphatase PP1-beta catalytic subunit;Serine/threonine-protein phosphatase	Ppp1cb	Ppp1cb	Serine/threonine-protein phosphatase PP1-beta catalytic subunit	P62141;Q3TBE5;Q3TL90;Q542E7;Q8C285;Q9DBY2	37.186	0	1.0494	912790000	568300000	344490000				1518	0.604836	0.518328	0.190549	9
586	Protein phosphatase 1C catalytic subunit;Serine/threonine-protein phosphatase PP1-gamma catalytic subunit;Serine/threonine-protein phosphatase	Ppp1cc;mCG_126872;mCG_129661	Ppp1cc	Isoform Gamma-2 of Serine/threonine-protein phosphatase PP1-gamma catalytic subunit;Isoform Gamma-1 of Serine/threonine-protein phosphatase PP1-gamma catalytic subunit	P63087-2;P63087;Q3U7K1;P63087-1;Q6ZWM8	38.504	0	0.93835	390680000	147820000	242860000				586	0.610247	0.598394	0.0950247	25
2276	Tyrosine-protein kinase Lyn;Putative uncharacterized protein;Yamaguchi sarcoma viral (V-yes-1) oncogene homolog	Lyn;RP23-49A12.2-001	Lyn	Isoform LYN A of Tyrosine-protein kinase Lyn;similar to lyn protein tyrosine kinase	P25911-1;P25911;Q3TCS3	58.812	2.27e-263	1.5096	4122000000	1722200000	2399800000				2276	0.602077	0.6018	0.0472956	27
314	CDC21 homolog;DNA replication licensing factor MCM4;P1-CDC21;Putative uncharacterized protein;Minichromosome maintenance deficient 4 homolog (S. cerevisiae);MKIAA4003 protein;Mcm4(Cdc21) protein	Cdc21;Mcm4;Mcmd4;mCG_126826;mKIAA4003;Mcm4(cdc21)	Mcm4	DNA replication licensing factor MCM4	P49717;Q3UA65;Q3UXG9;Q542F4;Q5DTS8;Q76NI2;Q8C1Z0;Q921D5;Q9D077	96.735	8.08e-166	1.1006	1835500000	939430000	896030000				314	0.595218	0.532622	0.190194	36
2208	Interferon-stimulated protein 15;IP17;Ubiquitin cross-reactive protein;G1p2 protein;ISG15 ubiquitin-like modifier	G1p2;Isg15;Ucrp;mCG_22597	Isg15	Ubiquitin cross-reactive protein	Q64339;Q4FJR9	17.897	4.55e-74	0.88746	502120000	301450000	200680000				2208	0.648475	0.517211	0.247166	7
40	DNA repair protein RAD50;RAD50 homolog (S. cerevisiae);Putative uncharacterized protein	Rad50;mCG_119249;RP23-239O19.3-001;RP23-239O19.3-005	Rad50	Isoform 1 of DNA repair protein RAD50;RAD50 homolog;Isoform 3 of DNA repair protein RAD50	P70388-1;P70388;P70388-2;Q5SV02;P70388-3;A8Y5I3;Q3V0R5	153.49	3.37e-148	1.3021	1656200000	1283500000	372690000				40	0.648675	0.580689	0.194576	24
1591	Ribose-phosphate pyrophosphokinase;Phosphoribosyl pyrophosphate synthase I;Ribose-phosphate pyrophosphokinase 1	mCG_19617;Prps1;RP23-137E3.3-001;Sid6061;AU021838;Mipol1	Prps1	phosphoribosyl pyrophosphate synthetase 1;Ribose-phosphate pyrophosphokinase;hypothetical protein LOC328099;Ribose-phosphate pyrophosphokinase 1;Ribose-phosphate pyrophosphokinase	Q76MX9;Q3TI27;Q3UYQ0;Q9D7G0;Q3UPD5	34.834	9.55e-38	1.0947	38394000	34695000	3699500				1591	0.633484	0.521897	0.215143	9
2050	Squamous cell carcinoma antigen recognized by T-cells 3;Tumor-rejection antigen SART3	Kiaa0156;Sart3	Sart3	Isoform 1 of Squamous cell carcinoma antigen recognized by T-cells 3;Isoform 2 of Squamous cell carcinoma antigen recognized by T-cells 3	Q9JLI8-1;Q9JLI8;Q9JLI8-2	109.62	2.48e-46	0.82554	195930000	133750000	62176000				2050	0.659999	0.48154	0.304233	12
946	E3 ubiquitin-protein ligase RING2;RING finger protein 1B;RING finger protein 2	DinG;Ring1b;Rnf2	Rnf2	E3 ubiquitin-protein ligase RING2	Q9CQJ4	37.623	9.68e-28	2.2083	100170000	55270000	44900000				946	0.69216	0.674283	0.115777	4
1008	WD repeat-containing protein 18;Wdr18 protein;Putative uncharacterized protein	Wdr18	Wdr18	WD repeat-containing protein 18;Putative uncharacterized protein	Q4VBE8;Q8K265;Q3TQM9	47.211	7.96e-13	1.7622	96012000	73686000	22326000				1008	0.600368	0.602377	0.0907418	4
1726	Cyclin-A/CDK2-associated protein p19;p19A;p19skp1;S-phase kinase-associated protein 1;S-phase kinase-associated protein 1A;Putative uncharacterized protein;MCG3634, isoform CRA_b	Skp1;Skp1a;mCG_3634;RP23-223A11.5-001	Skp1	S-phase kinase-associated protein 1	Q9WTX5;Q3TL58;Q5SUR3	18.672	2.26e-27	0.87549	57885000	28870000	29014000				1726	0.664426	0.498712	0.310839	5
1777	Tousled-like kinase 2 (Arabidopsis);Serine/threonine-protein kinase tousled-like 2;Tousled-like kinase 2;Tousled-like kinase;Putative uncharacterized protein;Tlk2 protein	RP23-456M3.2-006;Tlk2;Tlk;RP23-456M3.2-009	Tlk2	tousled-like kinase 2 isoform A;Isoform 1 of Serine/threonine-protein kinase tousled-like 2;Isoform 3 of Serine/threonine-protein kinase tousled-like 2;Isoform 2 of Serine/threonine-protein kinase tousled-like 2;Tousled-like kinase 2	B1ASU9;O55047-1;O55047;O55047-3;P70320;Q3TTG3;O55047-2;B7ZC85;Q6NZC4	85.341	2.07e-08	2.9272	135760000	35501000	100250000				1777	0.764342	0.745366	0.134274	5
512	DNA topoisomerase 2-alpha;DNA topoisomerase II, alpha isozyme;Putative uncharacterized protein;Top2a protein;DNA topoisomerase 2	Top2;Top-2;Top2a	Top2a	DNA topoisomerase 2-alpha	Q01320;Q3TTG4;Q3UUS6;Q52KI5;Q6PET9;Q8CCE5	172.88	1.55e-12	1.0035	133920000	63081000	70843000				512	0.647715	0.578699	0.2516	7
352	Histone deacetylase complex subunit Sin3a;Paired amphipathic helix protein Sin3a;Transcriptional corepressor Sin3a;MKIAA4126 protein;Putative uncharacterized protein	Sin3a;mKIAA4126	Sin3a	Isoform 1 of Paired amphipathic helix protein Sin3a;Isoform 3 of Paired amphipathic helix protein Sin3a;Isoform 4 of Paired amphipathic helix protein Sin3a;Isoform 2 of Paired amphipathic helix protein Sin3a;Isoform 5 of Paired amphipathic helix protein Si	Q60520-1;Q60520;Q570Z7;Q60520-3;Q60520-4;Q60520-2;Q3UVS7;Q60520-5	146.18	1.23e-12	1.2339	92189000	53895000	38295000				352	0.619461	0.567843	0.168798	8
869	Activator 1 36 kDa subunit;Activator 1 subunit 5;Replication factor C 36 kDa subunit;Replication factor C subunit 5;Putative uncharacterized protein;MCG8761;Replication factor C (Activator 1) 5;Rfc5 protein	Rfc5;mCG_8761	Rfc5	Replication factor C subunit 5;Rfc5 protein (Fragment)	Q9D0F6;Q3UDK3;Q5HZI8;Q8CFZ9	38.096	1.03e-06	0.81964	36401000	17133000	19267000				869	0.649095	0.497515	0.328753	5
2120	Protein timeless homolog;Putative uncharacterized protein;DEBT69	Tim1;Timeless;Timeless1;Debt69	Timeless	Isoform 1 of Protein timeless homolog;Isoform 2 of Protein timeless homolog;Isoform 6 of Protein timeless homolog;Isoform 5 of Protein timeless homolog;Isoform 4 of Protein timeless homolog;Isoform 3 of Protein timeless homolog	Q9R1X4-1;Q9R1X4;Q9R1X4-2;Q9R1X4-6;Q3U574;Q9R1X4-5;Q812D7;Q9R1X4-4;Q9R1X4-3	137.5	3.54e-14	2.141	87884000	42042000	45842000				2120	0.689116	0.682014	0.0221603	4
2478	Putative uncharacterized protein;DNA polymerase;DNA polymerase epsilon catalytic subunit A;DNA polymerase II subunit A	Pole;Pole1	Pole	DNA-directed DNA polymerase epsilon;DNA polymerase epsilon catalytic subunit A	Q3UPI9;Q3UR94;Q3UWI6;Q80XH7;Q9WVF7	262.1	1.88e-06	2.8402	112620000	66880000	45737000				2478	0.775378	0.791532	0.200915	11
