# Supplementary figures and images for: Protection of nascent DNA at stalled replication forks is mediated by phosphorylation of RIF1 intrinsically disordered region
Source: eLife journal article supplement (doi:10.7554/elife.75047), 2022-03-31

**C**

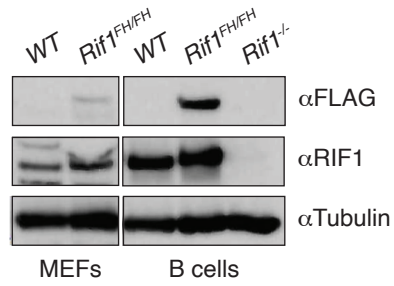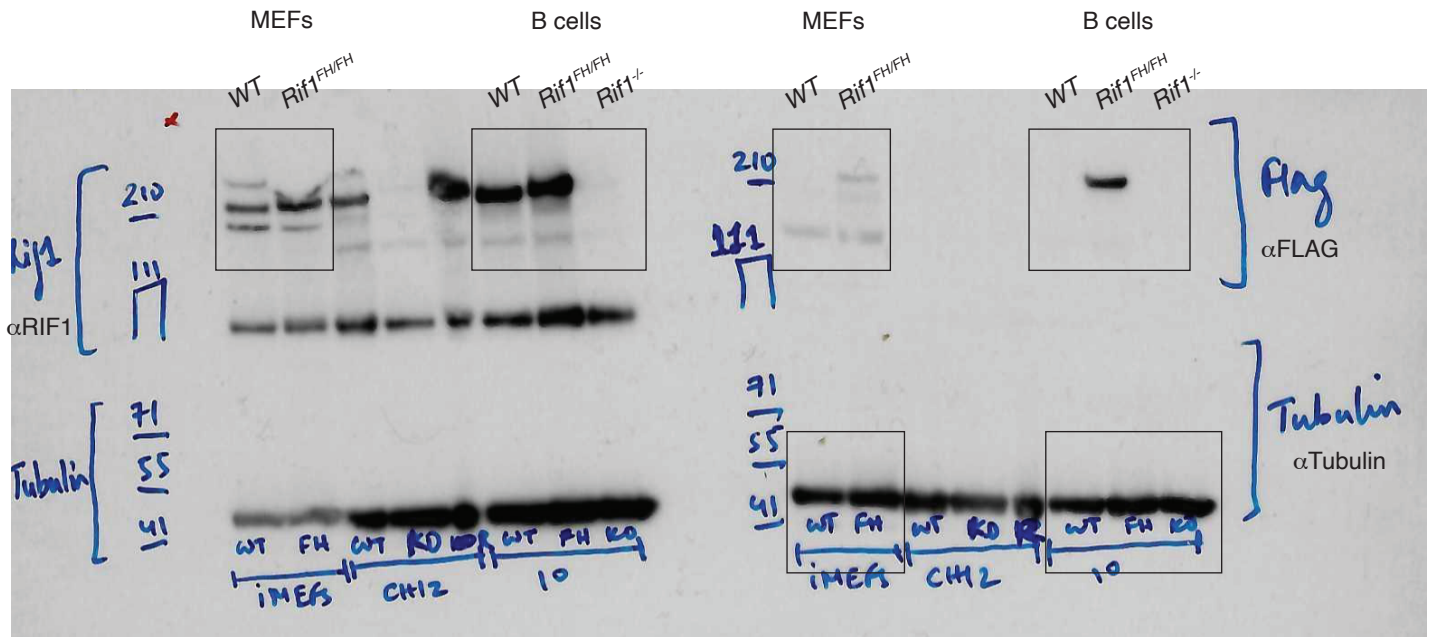

**Figure 1**

Supplement: fig1-data4 [file 75047Figure1SourceData4.pdf › 75047Figure1SourceData4.pdf]

C

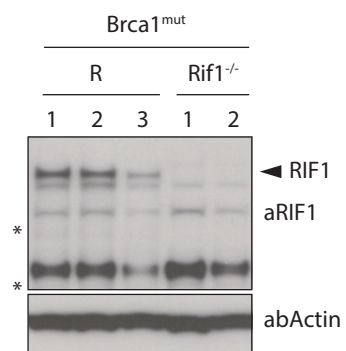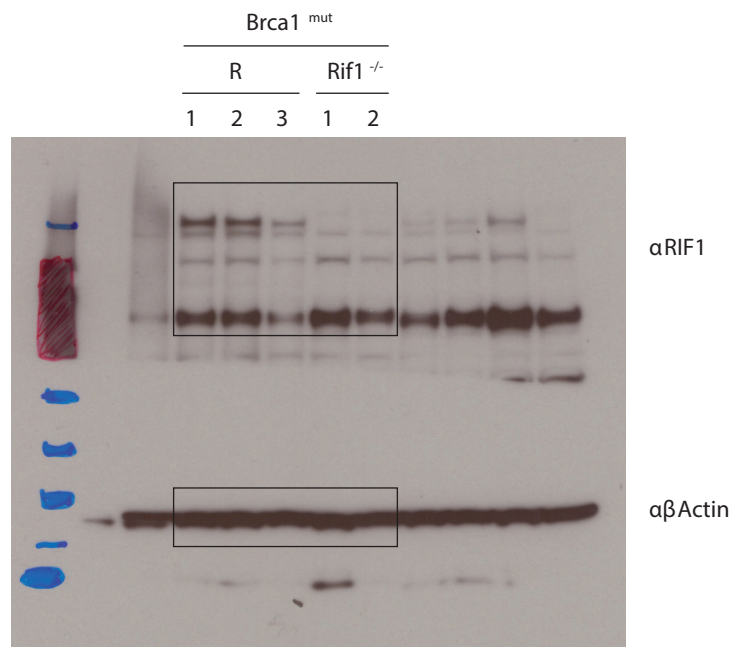

Figure 2 - figure supplement 2

Supplement: fig2-figsupp2-data2 [file elife-75047-fig2-figsupp2-data2-v1.zip]

G

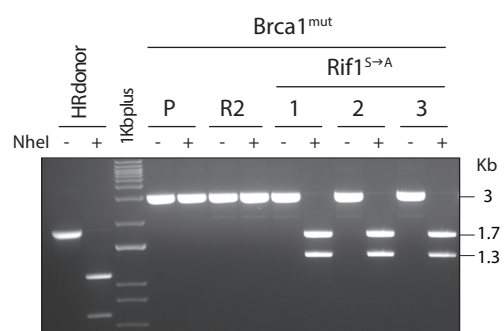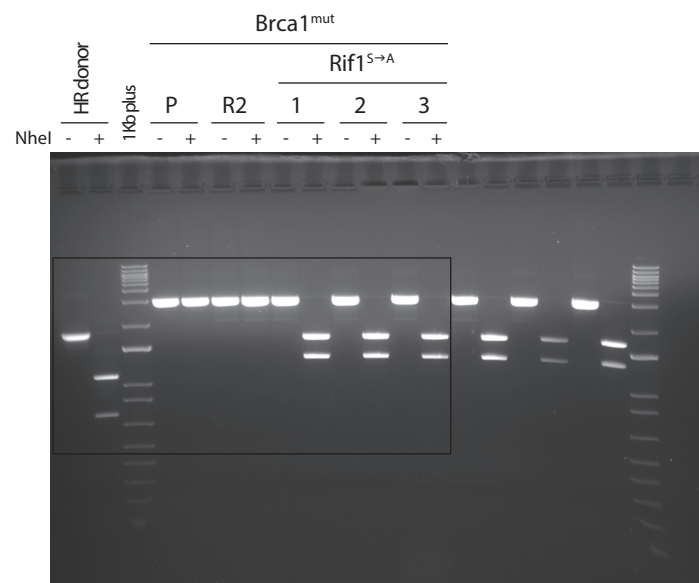

Figure 2 - figure supplement 2

Supplement: fig2-figsupp2-data4 [file elife-75047-fig2-figsupp2-data4-v1.zip]

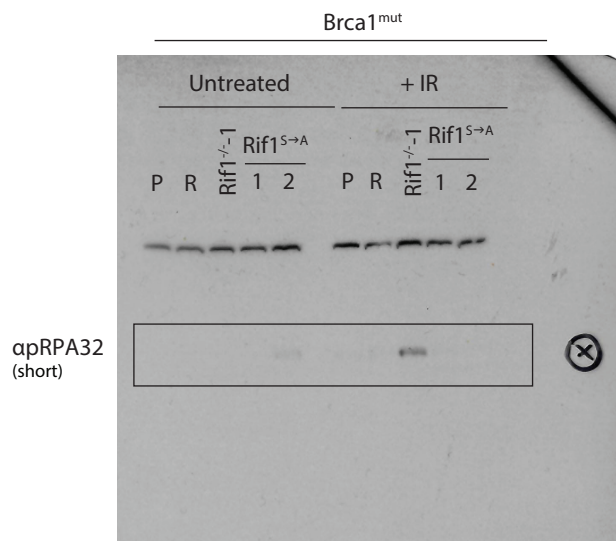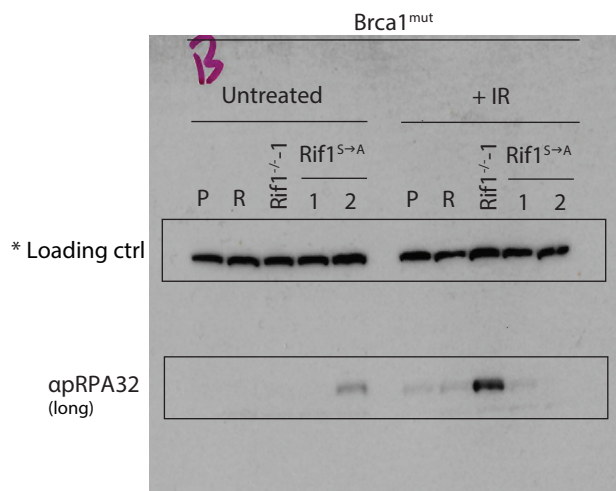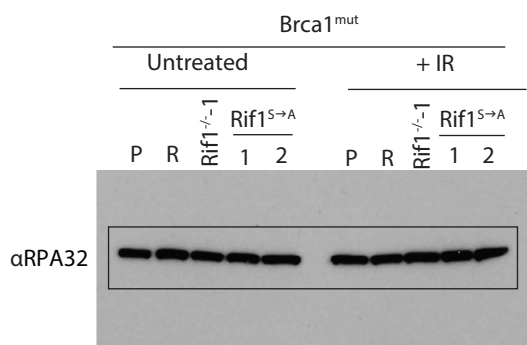

H

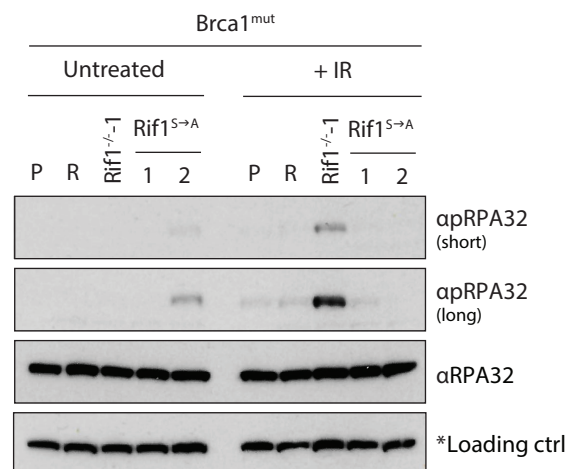

Figure 2 - figure supplement 2

Supplement: fig2-figsupp2-data8 [file elife-75047-fig2-figsupp2-data8-v1.zip]

A

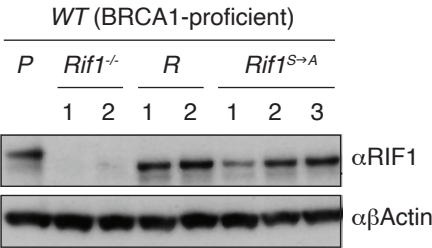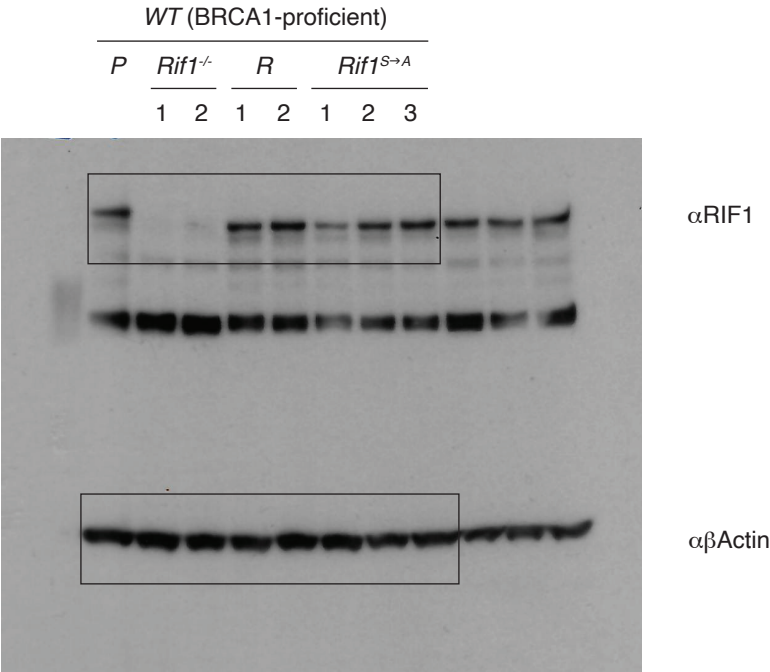

Figure 3

Supplement: fig3-data2 [file elife-75047-fig3-data2-v1.zip]

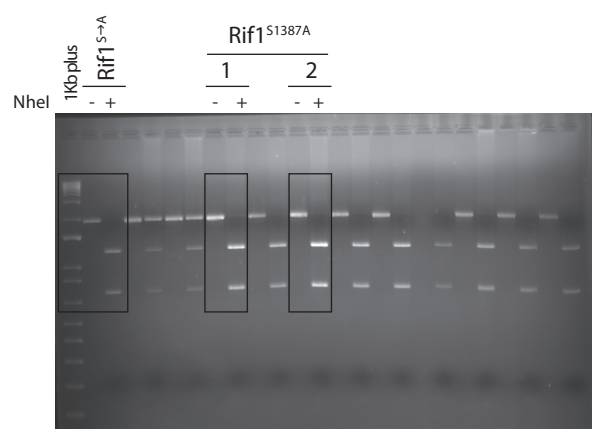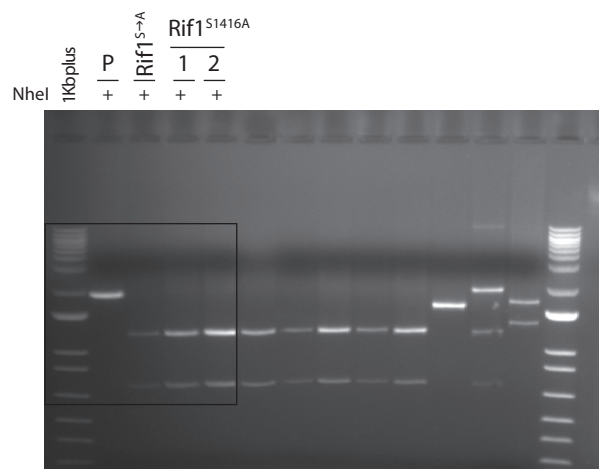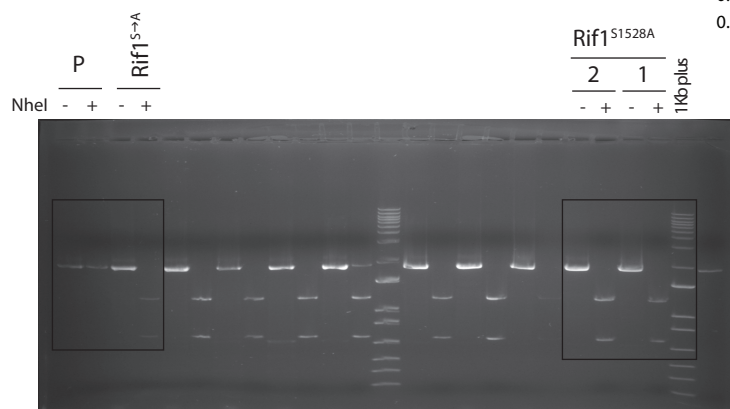

F

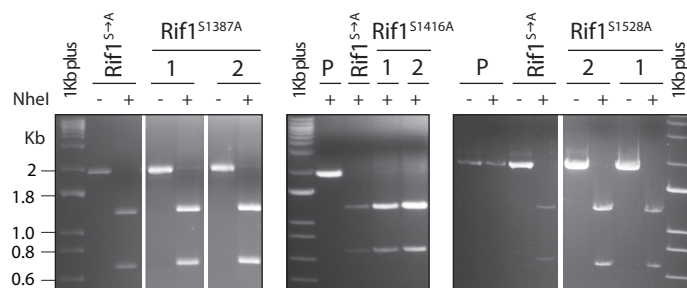

Figure 3 - figure supplement 1

Supplement: fig3-figsupp1-data12 [file 75047Figure3S1SourceData12.pdf › 75047Figure3S1SourceData12.pdf]

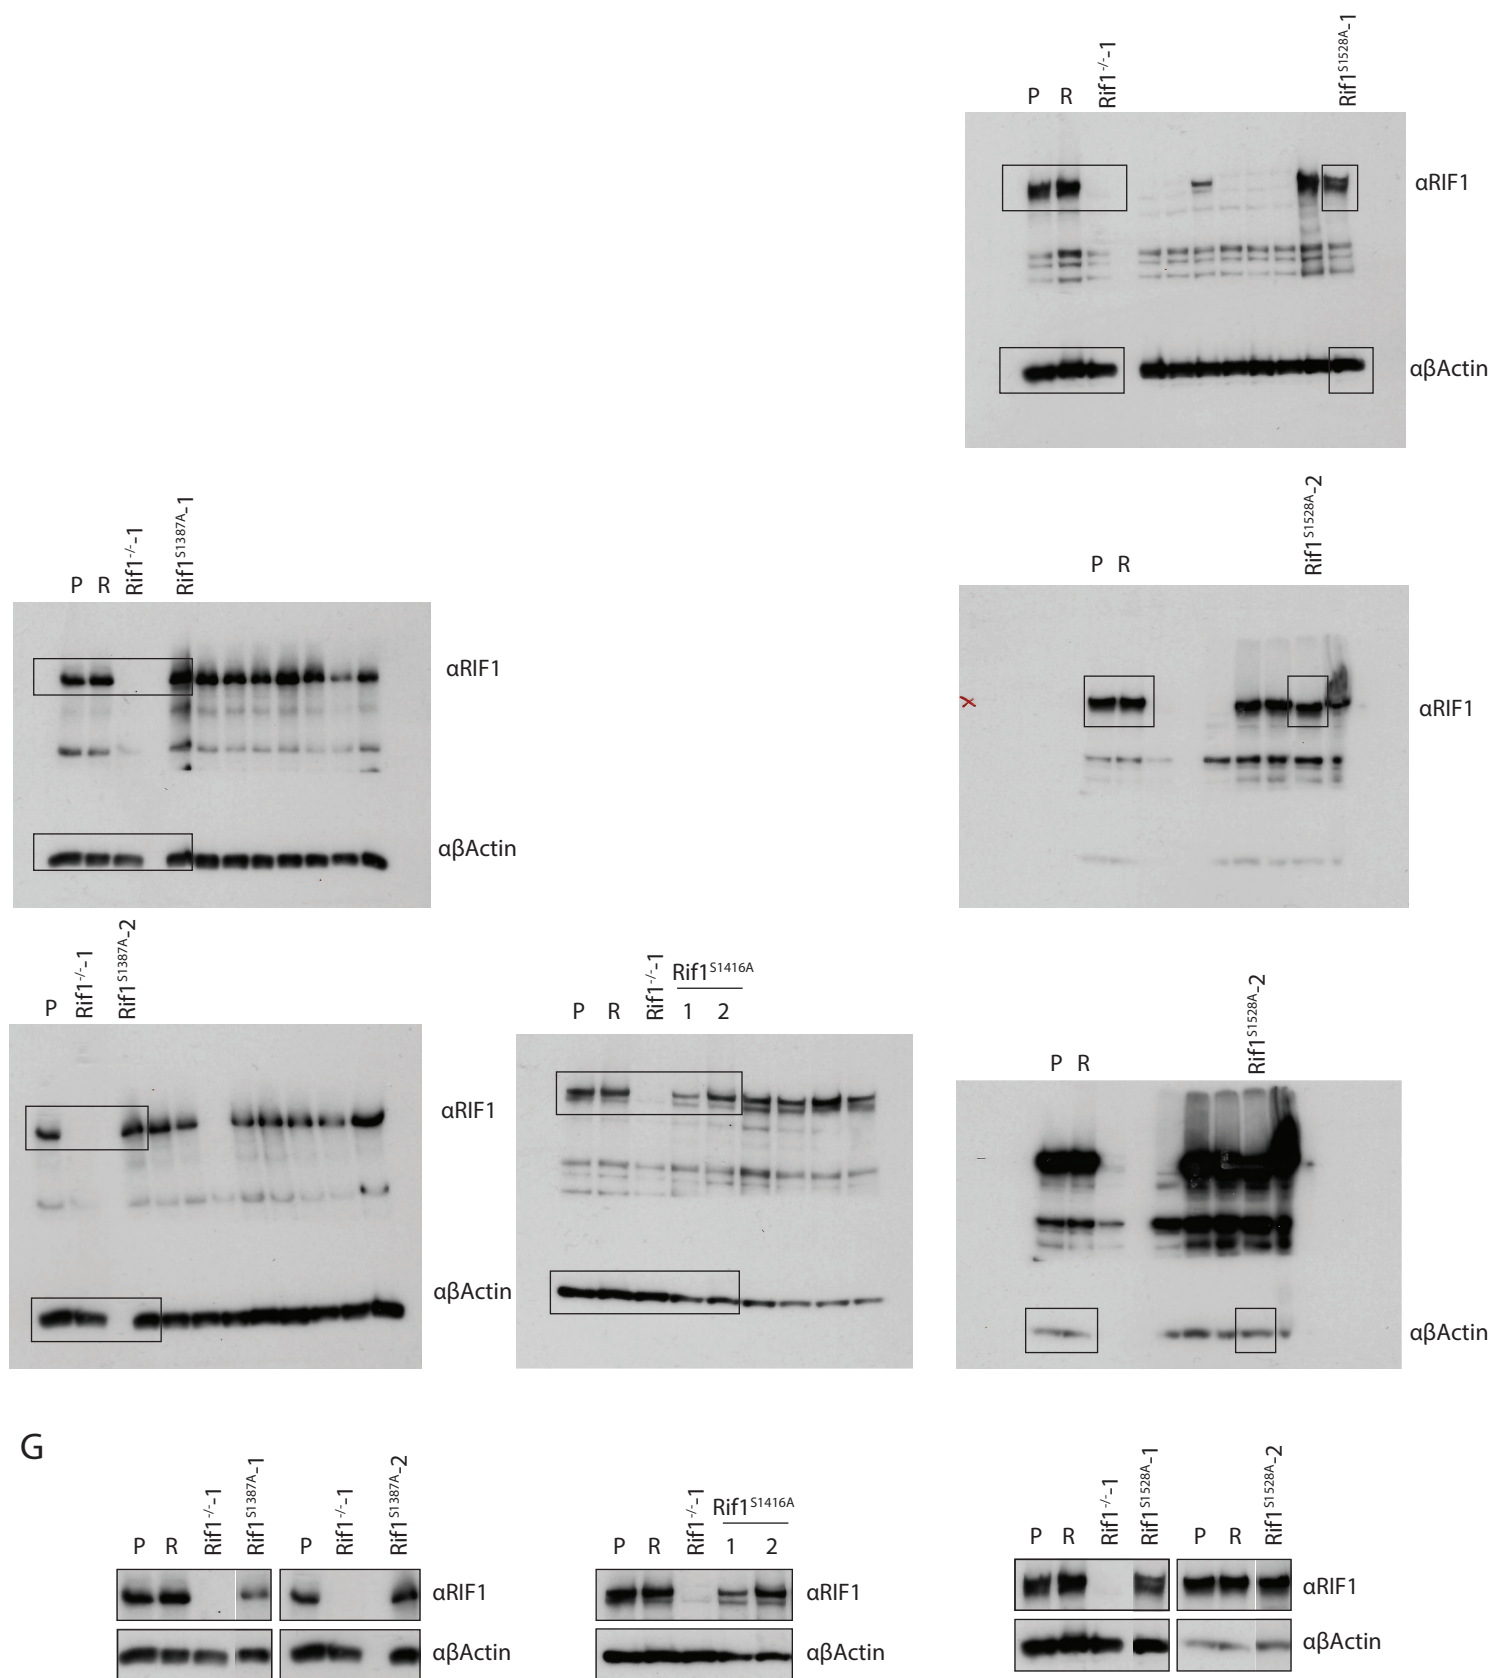

Figure 3 - figure supplement 1

Supplement: fig3-figsupp1-data18 [file elife-75047-fig3-figsupp1-data18-v1.zip]

B

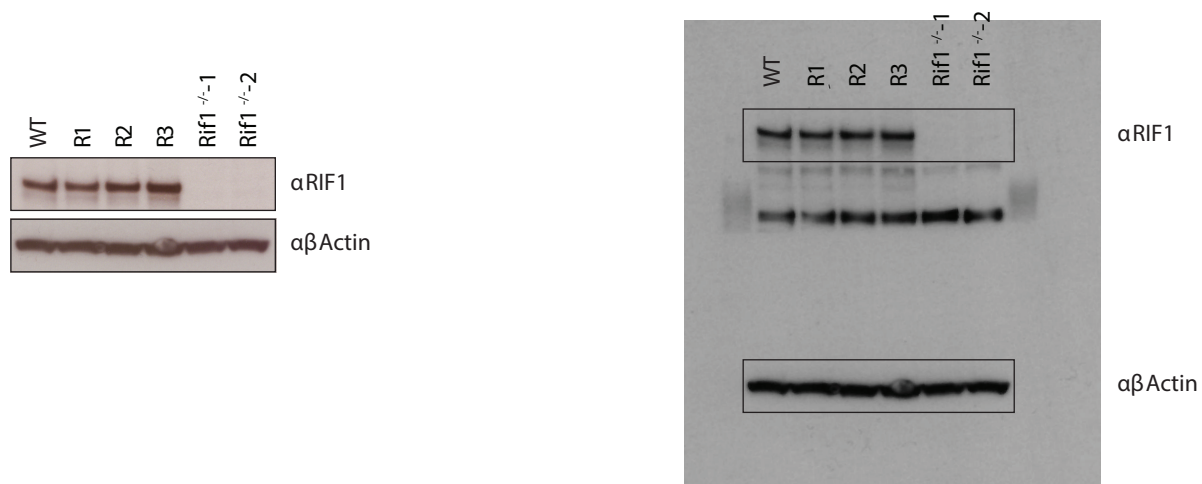

Figure 3 - figure supplement 1

Supplement: fig3-figsupp1-data2 [file elife-75047-fig3-figsupp1-data2-v1.zip]

C

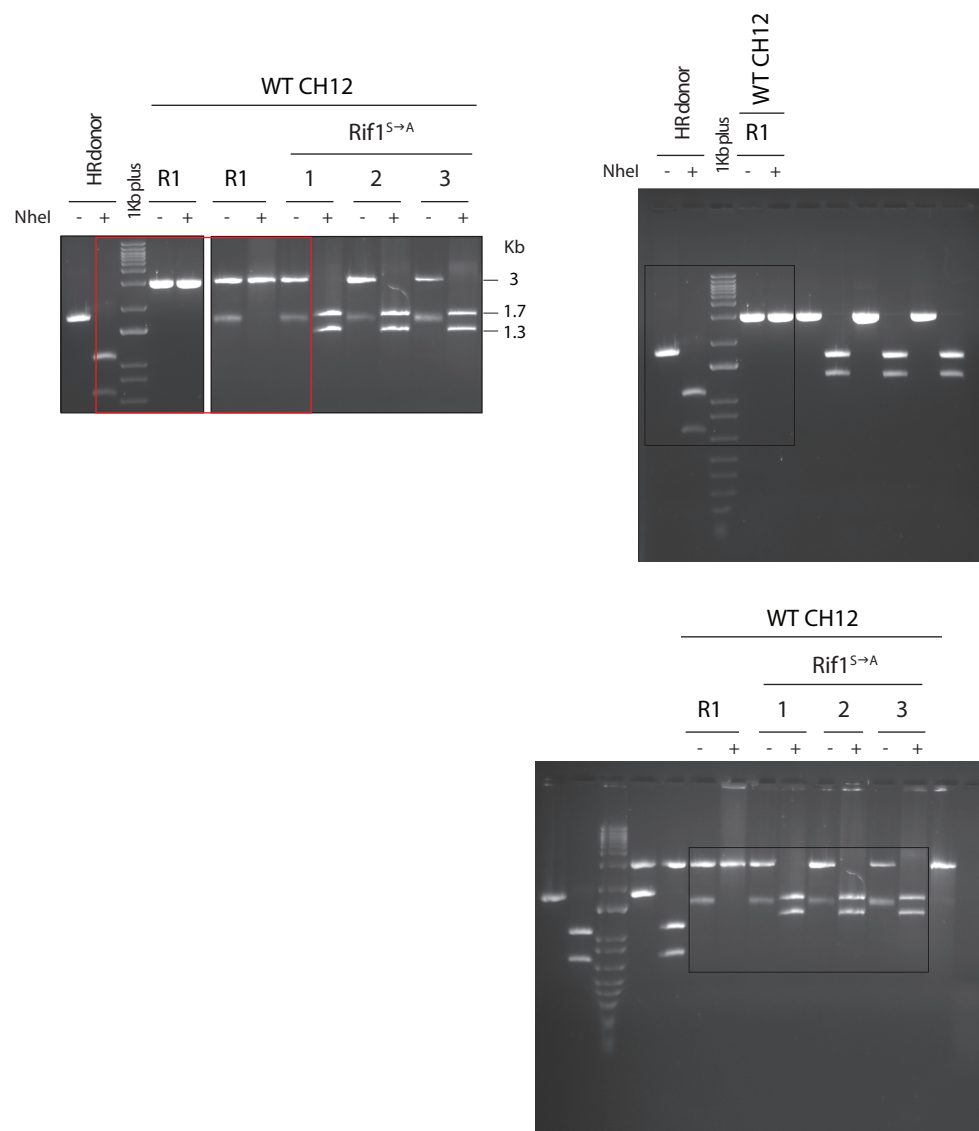

Figure 3 - figure supplement 1

Supplement: fig3-figsupp1-data5 [file 75047Figure3S1SourceData5.pdf.pdf › 75047Figure3S1SourceData5.pdf.pdf]

E

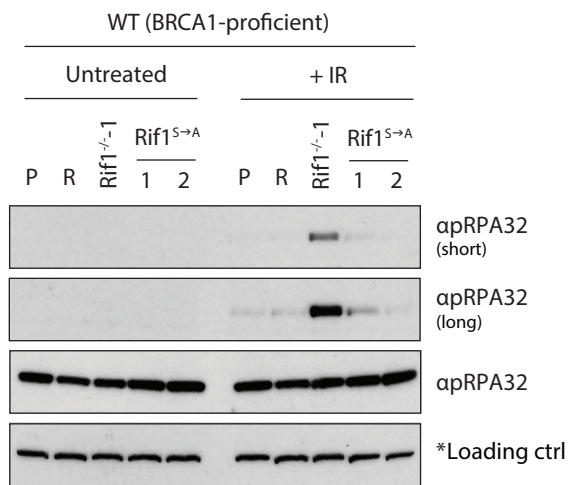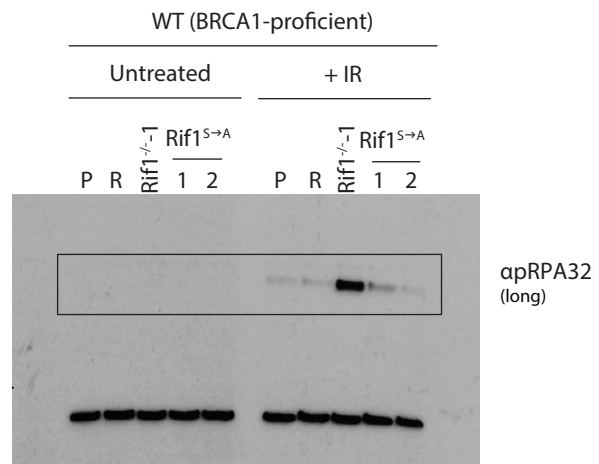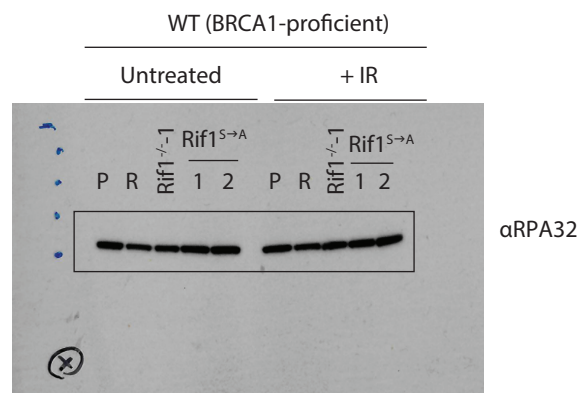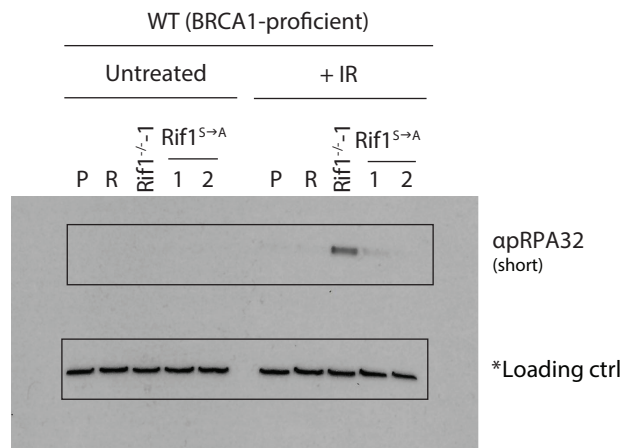

Figure 3 - figure supplement 1

Supplement: fig3-figsupp1-data8 [file elife-75047-fig3-figsupp1-data8-v1.zip]

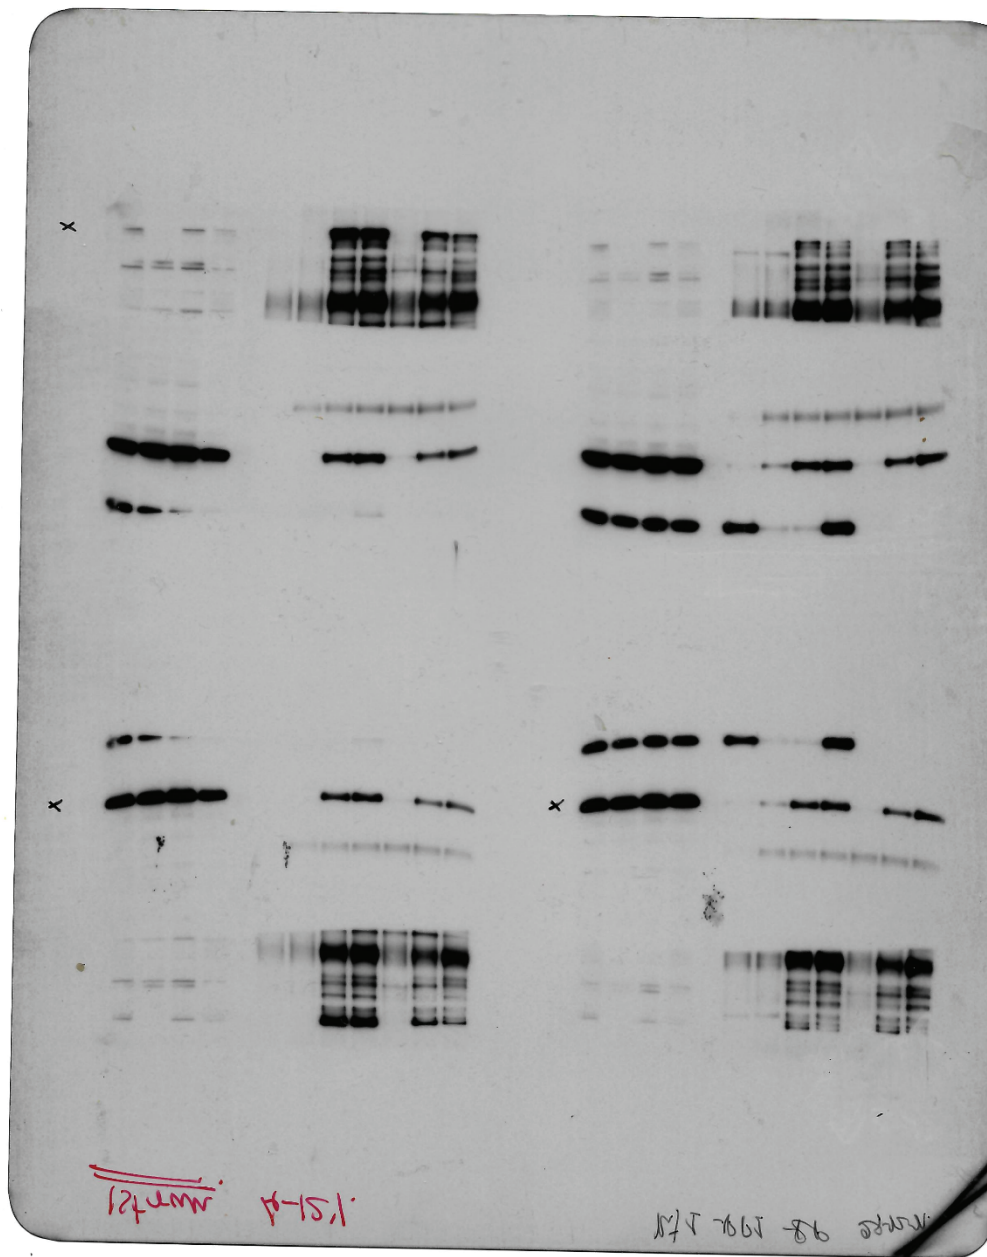

Sample 98 1992 1/51

151-d. untreated

Supplement: fig4-data3 [file elife-75047-fig4-data3-v1.zip]

**A**

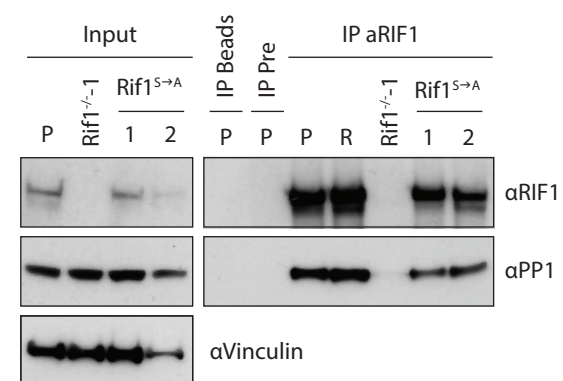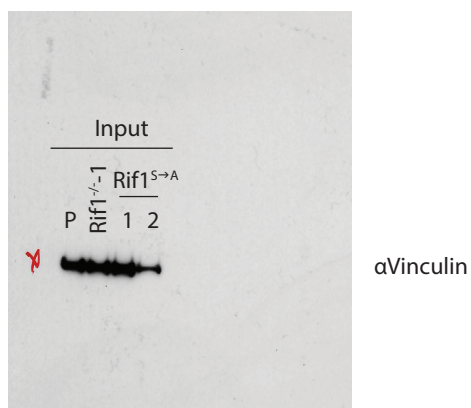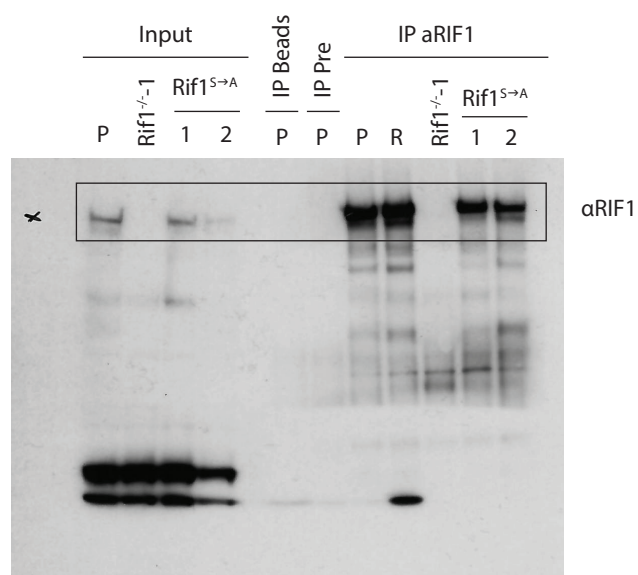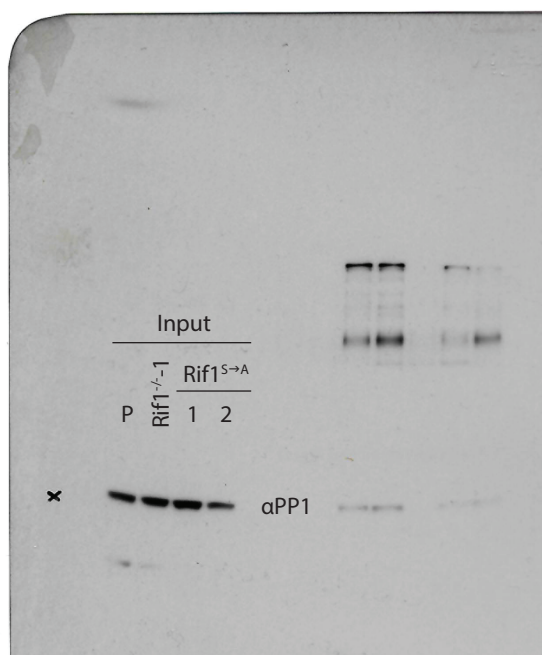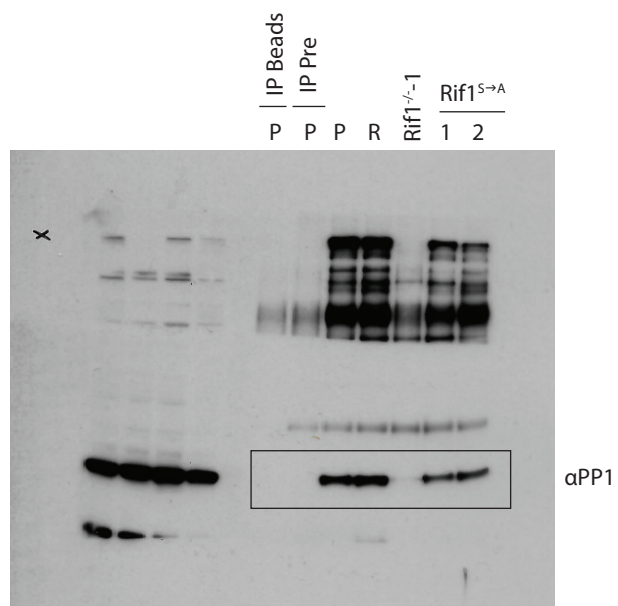

**Figure 4**

Supplement: fig4-data5 [file elife-75047-fig4-data5-v1.zip]

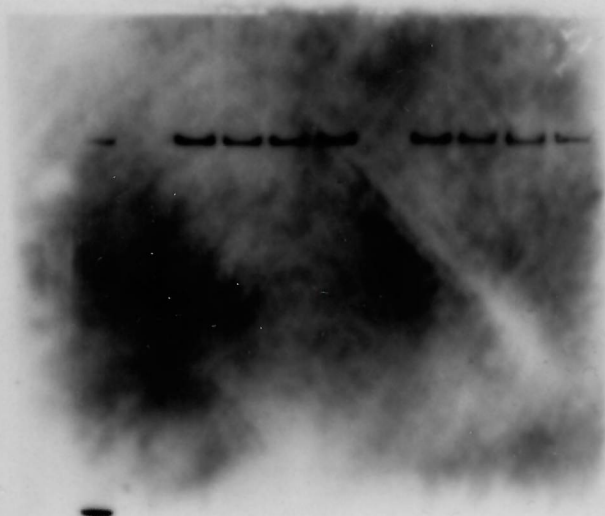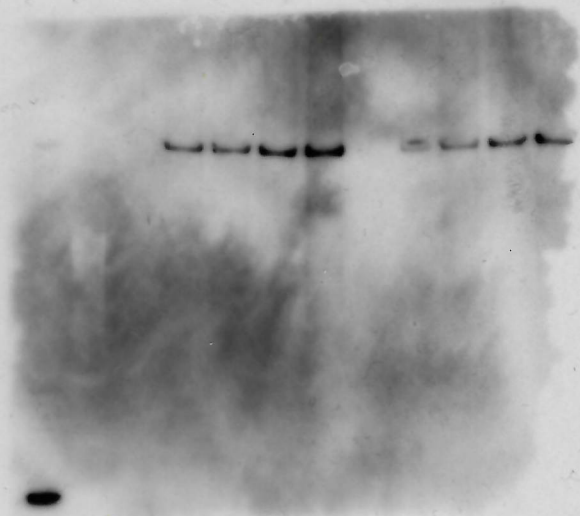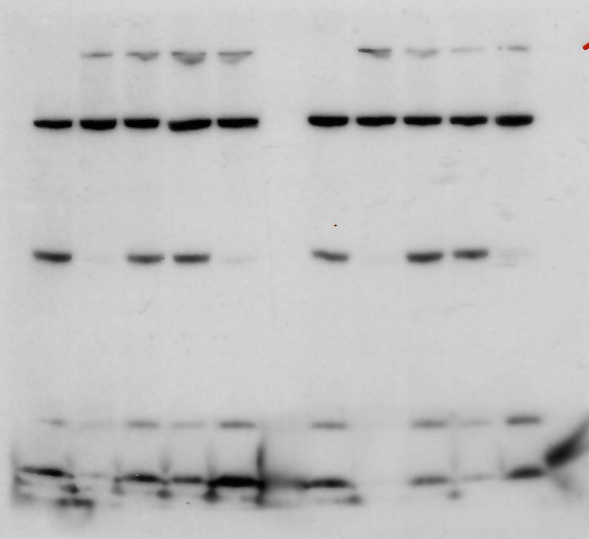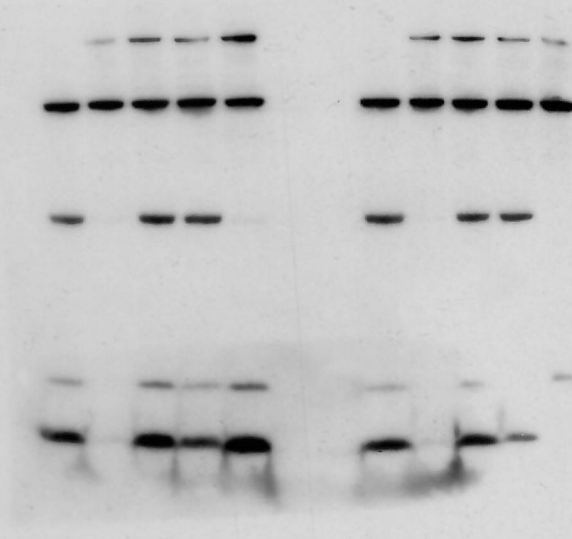

Supplement: fig4-data7 [file elife-75047-fig4-data7-v1.zip]
